# Supplementary material for: Effect of gel structure on the gastric digestion of whey protein emulsion gels
Source: Royal Society of Chemistry journal article supplement (doi:10.1039/c3sm52758a), 2014-01-01
Supplement: c3sm52758a.pdf [file c3sm52758a.pdf]

1

## 2 Supplementary Information

### 3 1 Swelling experiment

4 Gel sample (3 g and 5 mm thickness) was placed in 40 ml simulated gastric fluid (SGF) without  
5 added pepsin. Experiments were carried out at 37 °C. The gels were taken out of the solution after 1, 2, 3,  
6 4, 5 and 20 h incubation respectively and excess water was removed by gently blotting with a tissue paper  
7 and the mass of the gel was recorded. Swelling ratio (SR) was calculated using the following expression:  
8  $SR = (W_t - W_0) / W_0$ , where  $W_t$  denotes the weight of the gel at time  $t$  and  $W_0$  is the initial weight of the  
9 gel.<sup>1</sup> Experiments were replicated 6 times.

10

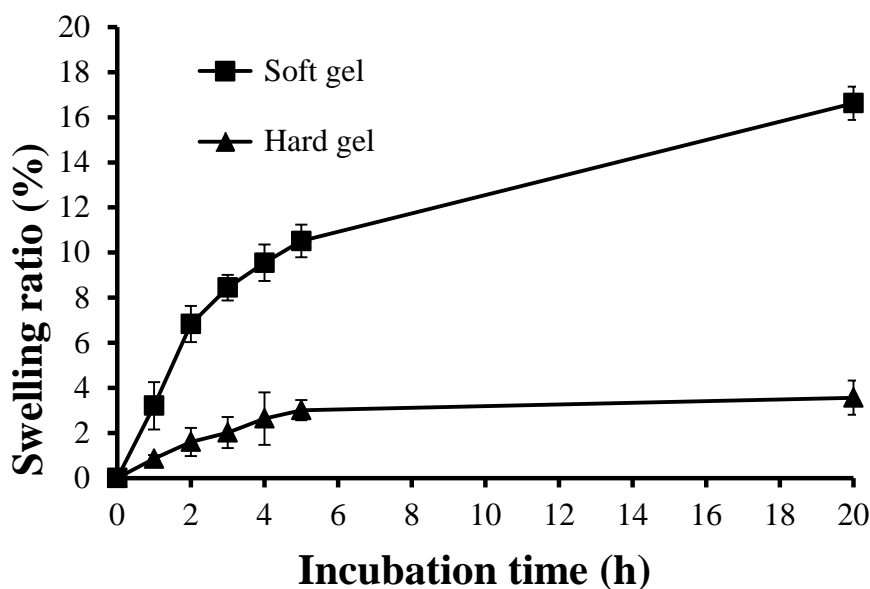

11

12

13 Figure S1 Swelling kinetics of heat-set whey protein emulsion gels in the SGF

14

## 15 2 Reference

16 1. B. Vardhanabhuti, W. Khayankan and E. A. Foegeding, J. Food Sci., 2010, 75, E305-E313.

17
